# Supplementary material for: Nonparametric methods for the analysis of single-color pathogen microarrays
Source: Springer Nature journal article supplement (doi:10.1186/1471-2105-11-354), 2010-06-28

A)

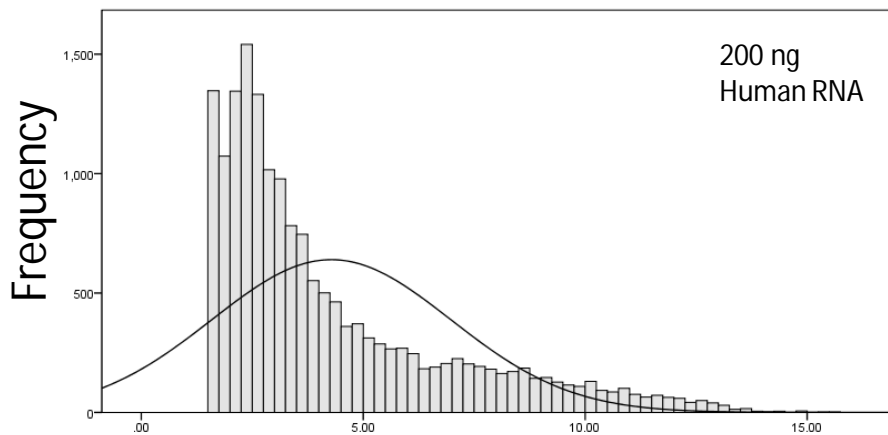

B)

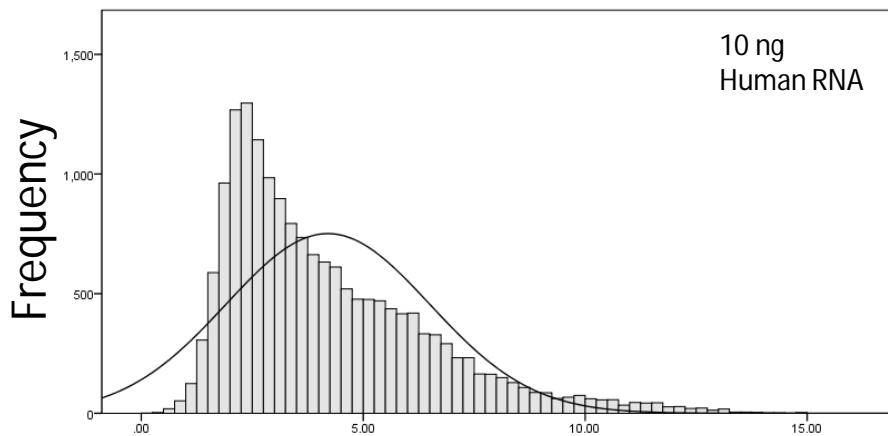

C)

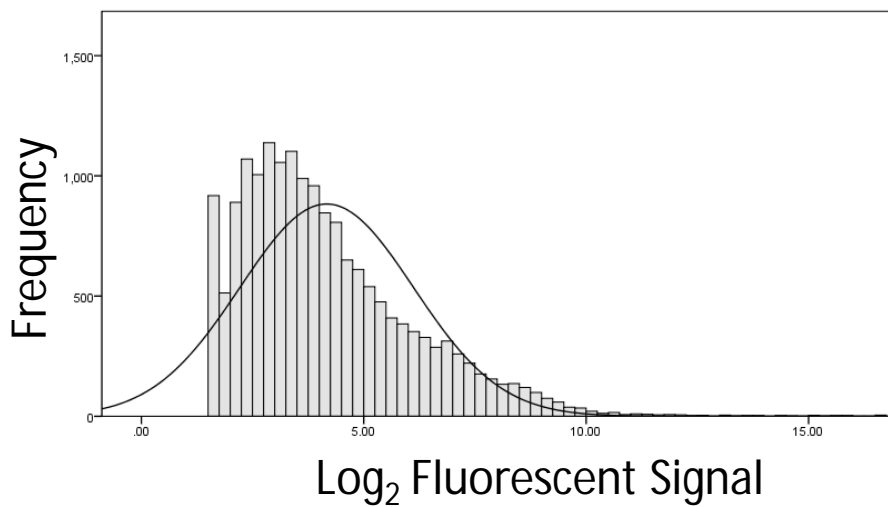

Supplement: 12859_2009_3811_MOESM11_ESM.pdf [file 12859_2009_3811_MOESM11_ESM.pdf]
